# Supplementary material for: Palladium(ii)-assisted activation of thioglycosides
Source: Royal Society of Chemistry journal article supplement (doi:10.1039/d1ob00004g), 2021-01-01

**Supporting information**

**Palladium(II)-Assisted Activation of Thioglycosides**

Samira Escopy, Yashapal Singh,\* and Alexei V. Demchenko\*

*Department of Chemistry and Biochemistry, University of Missouri – St. Louis  
One University Boulevard, St. Louis, MO 63121, USA*

E-mail: [demchenkoa@umsl.edu](mailto:demchenkoa@umsl.edu); [satpal04@gmail.com](mailto:satpal04@gmail.com)

**Contents:**

|                                        |     |
|----------------------------------------|-----|
| <sup>1</sup> H-NMR Experiments         | S2  |
| NMR Spectra for New Compounds          | S4  |
| NMR Proton Spectra for Known Compounds | S14 |

## <sup>1</sup>H NMR Experiments

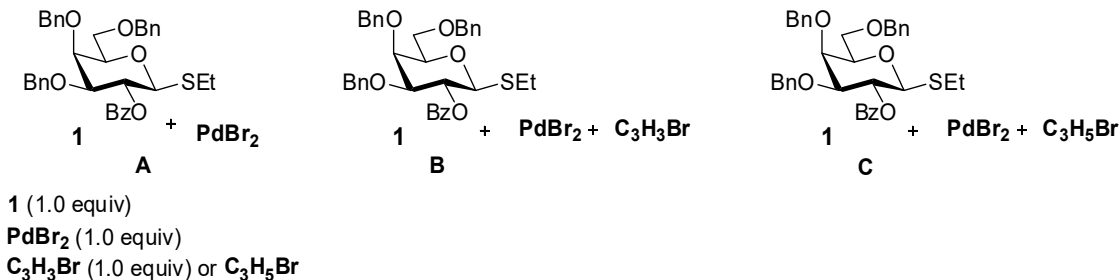

**<sup>1</sup>H-NMR study of PdBr<sub>2</sub> complexation with thioglycoside 1 in CDCl<sub>3</sub> (A).** To a solution of **1** (10 mg, 0.01 mmol) in 0.5 mL CDCl<sub>3</sub>, **PdBr<sub>2</sub>** (4.4 mg, 0.01 mmol) was added and the mixture stirred at rt for 12 h, then the sample was immediately taken for NMR analysis.

**<sup>1</sup>H-NMR study of PdBr<sub>2</sub> with thioglycoside 1 in presence of C<sub>3</sub>H<sub>3</sub>Br in CDCl<sub>3</sub> (B).** To a solution of **1** (10 mg, 0.01 mmol) in 0.5 mL CDCl<sub>3</sub>, **C<sub>3</sub>H<sub>3</sub>Br** (1.5 μL, 0.01 mmol) and **PdBr<sub>2</sub>** (4.4 mg, 0.01 mmol) were added and the mixture stirred at rt for 12 h, then the sample was immediately taken for NMR analysis (Fig 1).

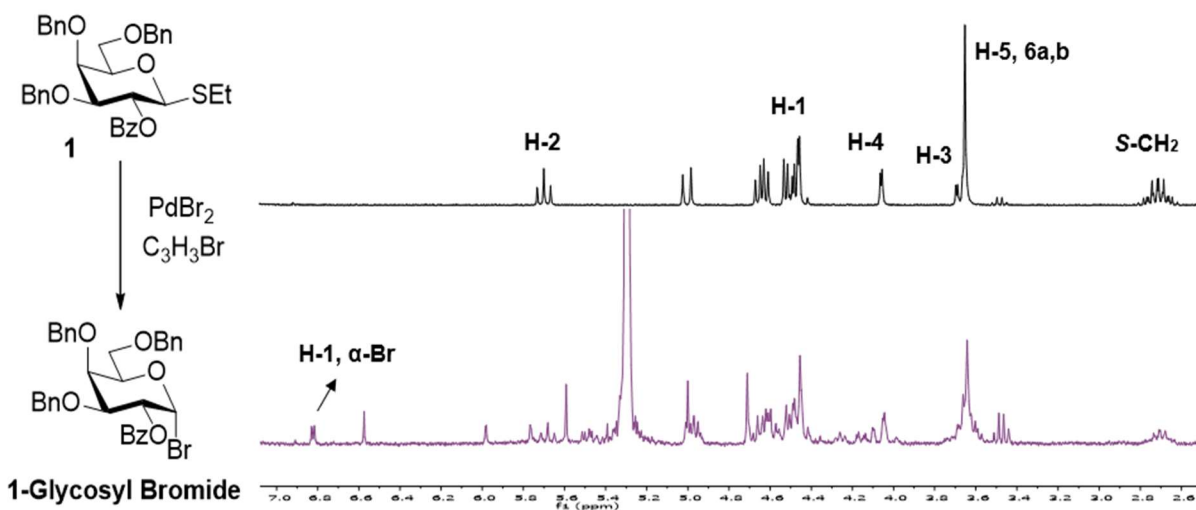

**Figure 1.** <sup>1</sup>H NMR studies of PdBr<sub>2</sub> in the presence of C<sub>3</sub>H<sub>3</sub>Br with donor **1** in CDCl<sub>3</sub> at rt.

The <sup>1</sup>H NMR experiment was conducted in the presence of propargyl bromide (Fig 1) show an entirely new set of proton signals were appeared along with signals of donor **1**. The above observation revealed that thiogalactoside **1** partially converted to corresponding α-galactosyl bromide (H-1 at 6.81 ppm) in the presence of propargyl bromide and absence of glycosyl acceptor.

**<sup>1</sup>H-NMR study of PdBr<sub>2</sub> with thioglycoside 1 in presence of C<sub>3</sub>H<sub>5</sub>Br (allyl bromide) in CDCl<sub>3</sub>**  
**(C)** To a solution of **1** (10 mg, 0.01 mmol) in 0.5 mL CDCl<sub>3</sub>, C<sub>3</sub>H<sub>5</sub>Br (1.4 μL, 0.01 mmol) and PdBr<sub>2</sub> (4.4 mg, 0.01 mmol) were added and the mixture stirred at rt for 12 h, then the sample was immediately taken for NMR analysis (Fig 2).

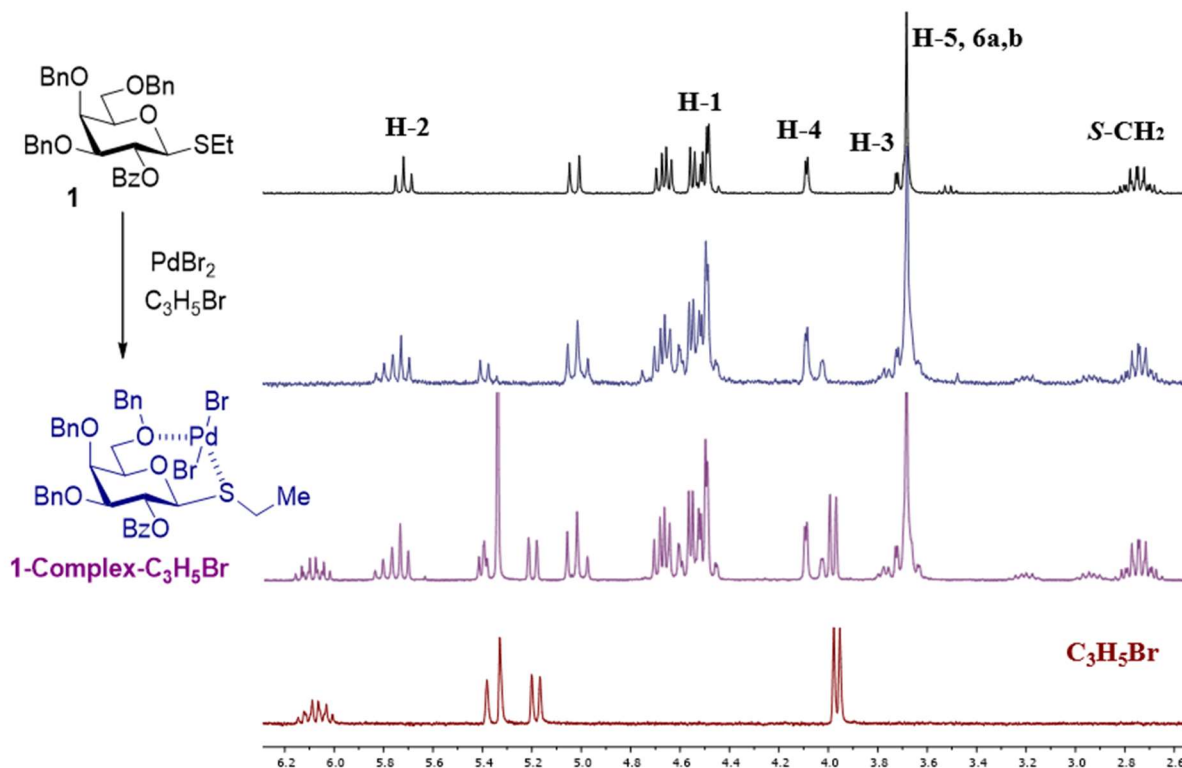

**Figure 2.** <sup>1</sup>H NMR studies of PdBr<sub>2</sub> in the presence of C<sub>3</sub>H<sub>5</sub>Br with donor **1** in CDCl<sub>3</sub> at rt.

The <sup>1</sup>H NMR experiment conducted in the presence of allyl bromide (Fig 2, 3<sup>rd</sup> spectrum) show the complexation of PdBr<sub>2</sub> with thiogalactoside **1** without an interaction between the additive and PdBr<sub>2</sub>; thus, the formation of corresponding α-galactosyl bromide was not observed in absence of glycosyl acceptor.

# NMR Spectra for New Compounds

## Cholesteryl 2-O-benzoyl-3,4,6-tri-O-benzyl-β-D-galactopyranoside (9).

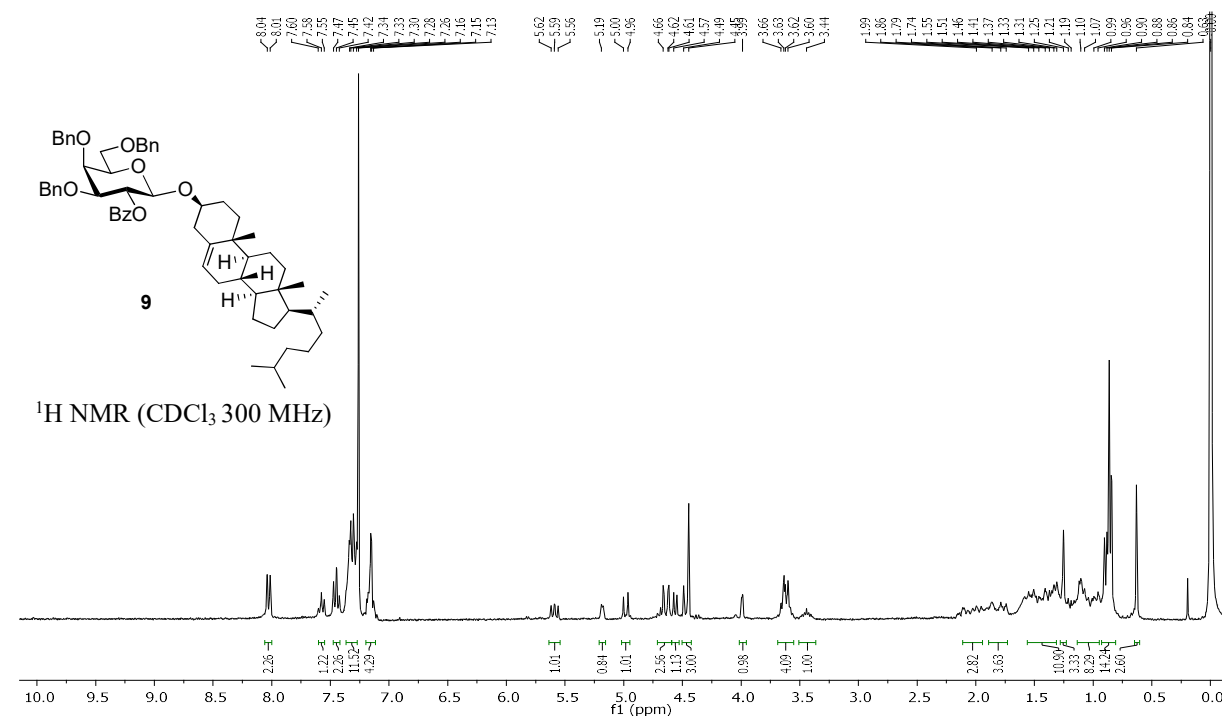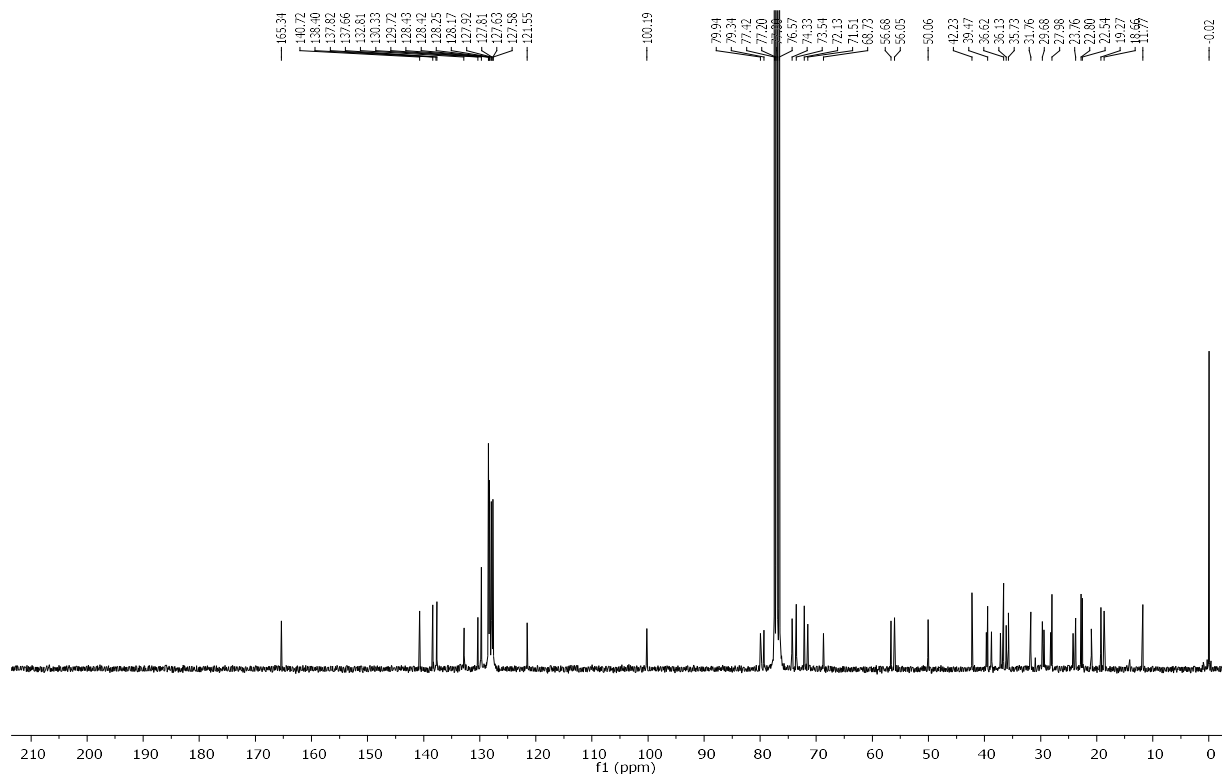

<sup>13</sup>C NMR (CDCl<sub>3</sub> 75 MHz)

COSY NMR (CDCl<sub>3</sub>, 300 MHz)

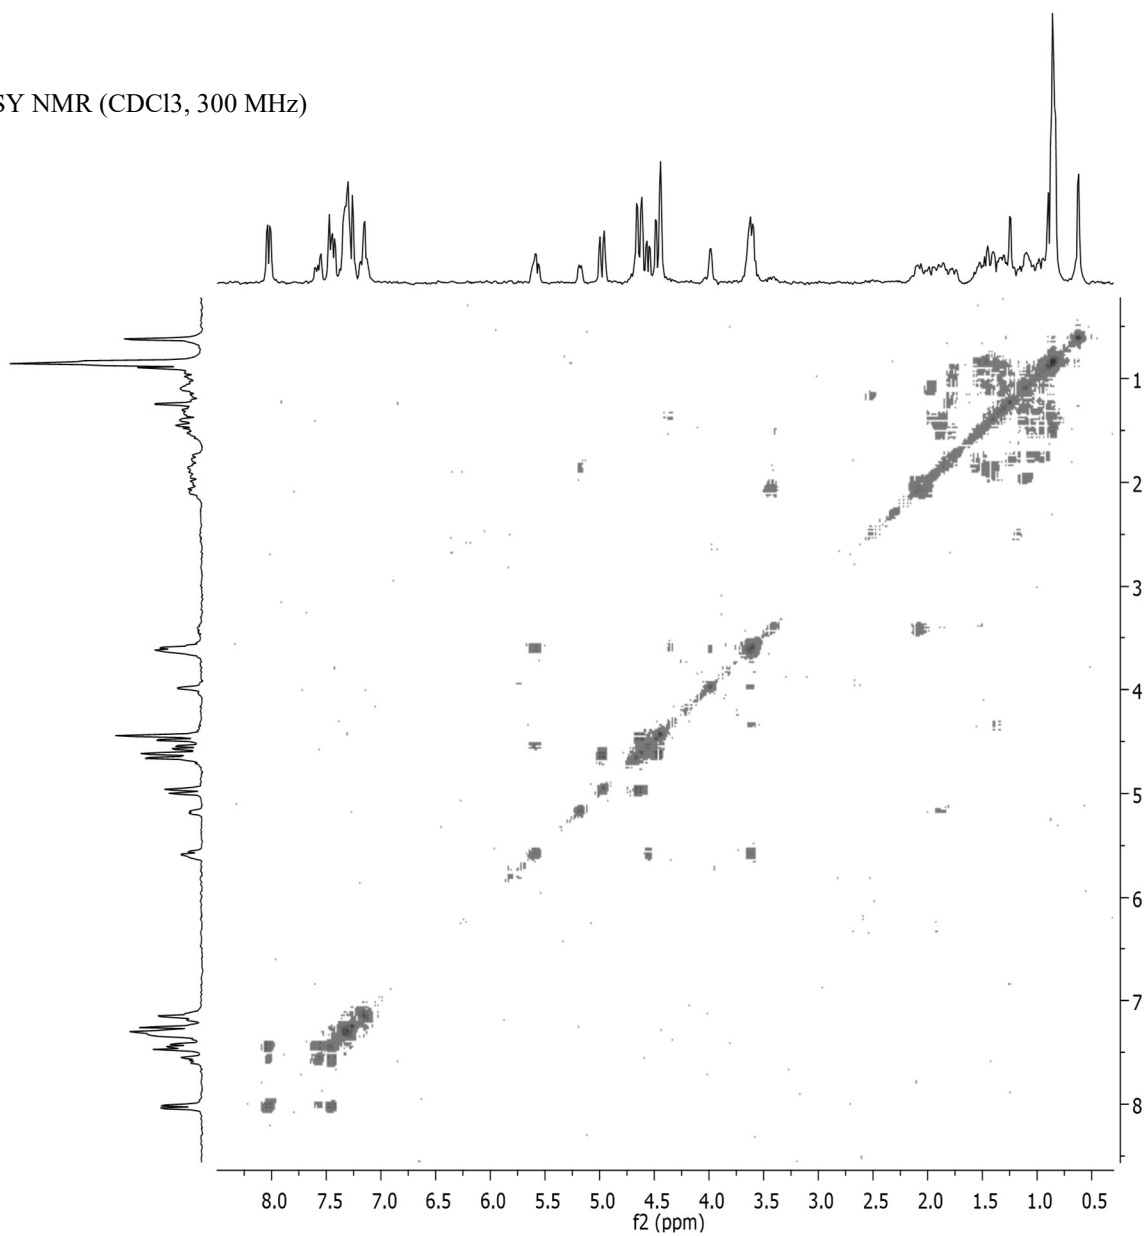

**Methyl 6-*O*-(4,6-di-*O*-benzyl-2-deoxy-3-*O*-fluorenylmethoxycarbonyl-2-phthalimido- $\beta$ -D-glucopyranosyl)-2,3,4-tri-*O*-benzyl- $\alpha$ -D-glucopyranoside (17).**

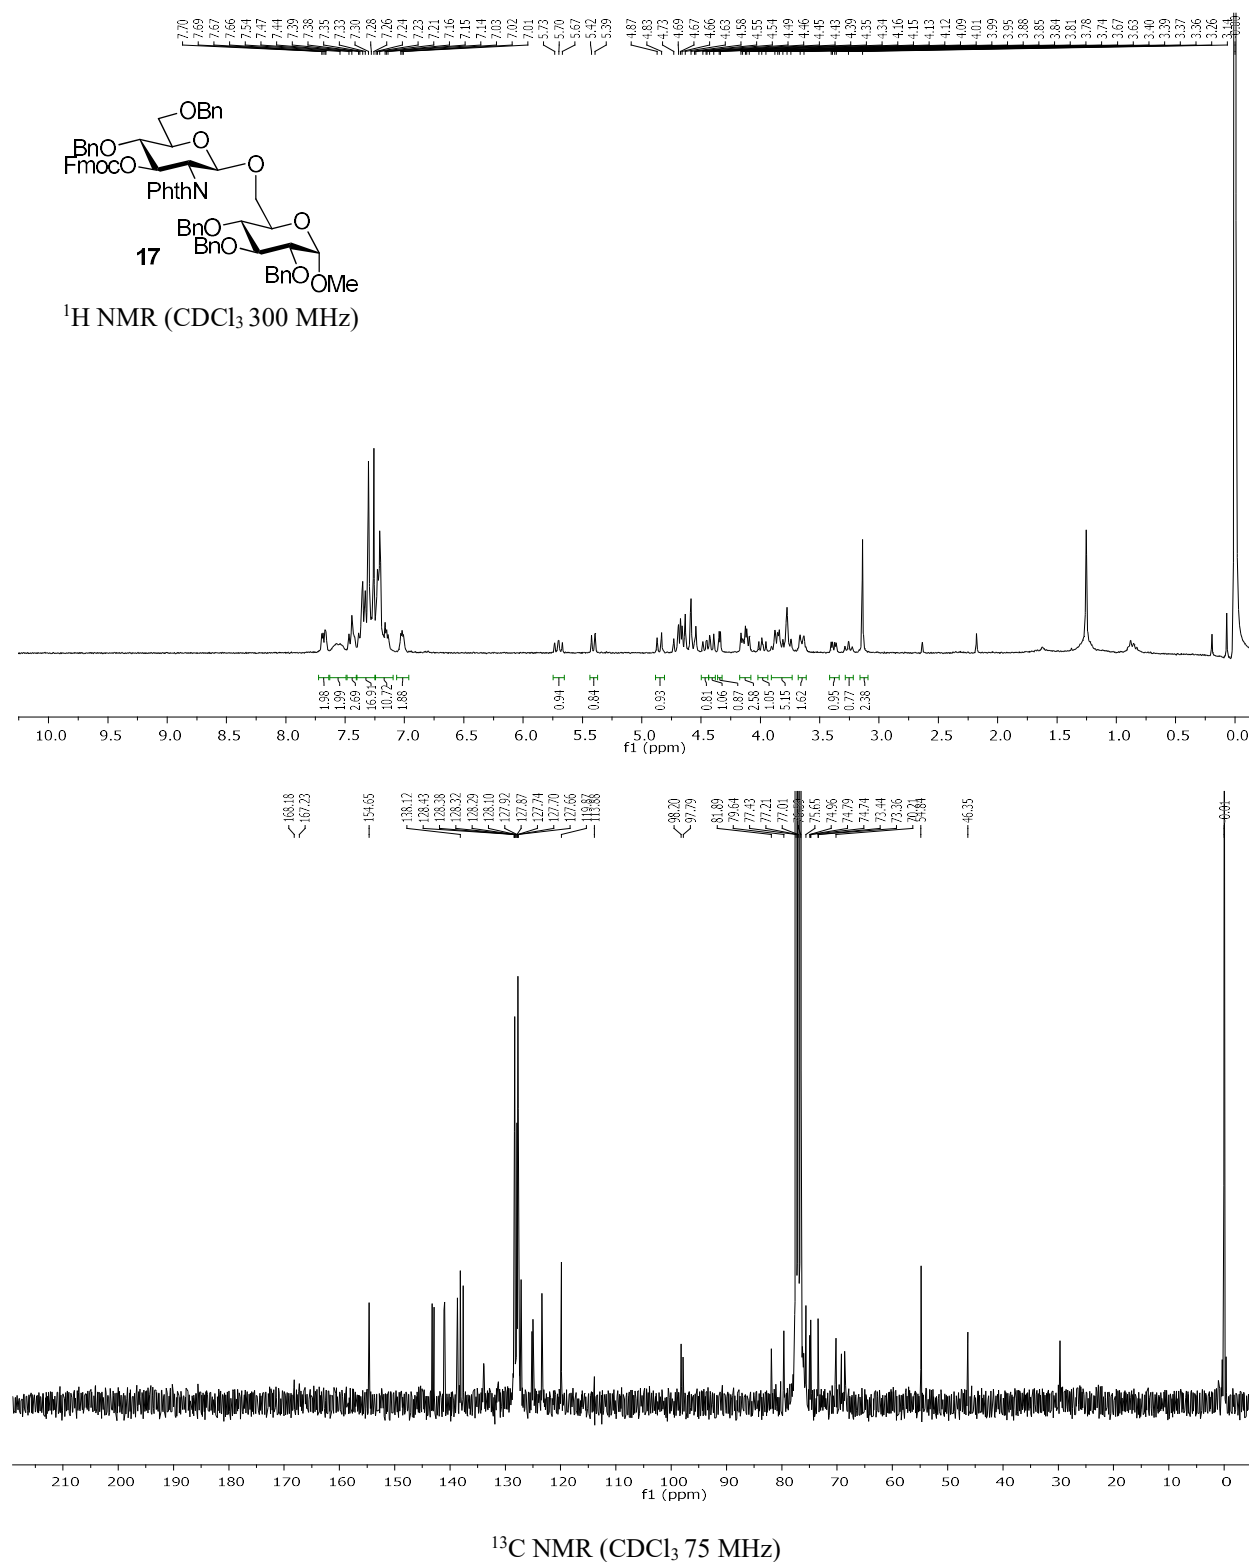

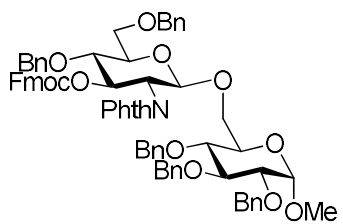

COSY NMR (CDCl<sub>3</sub>, 300 MHz)

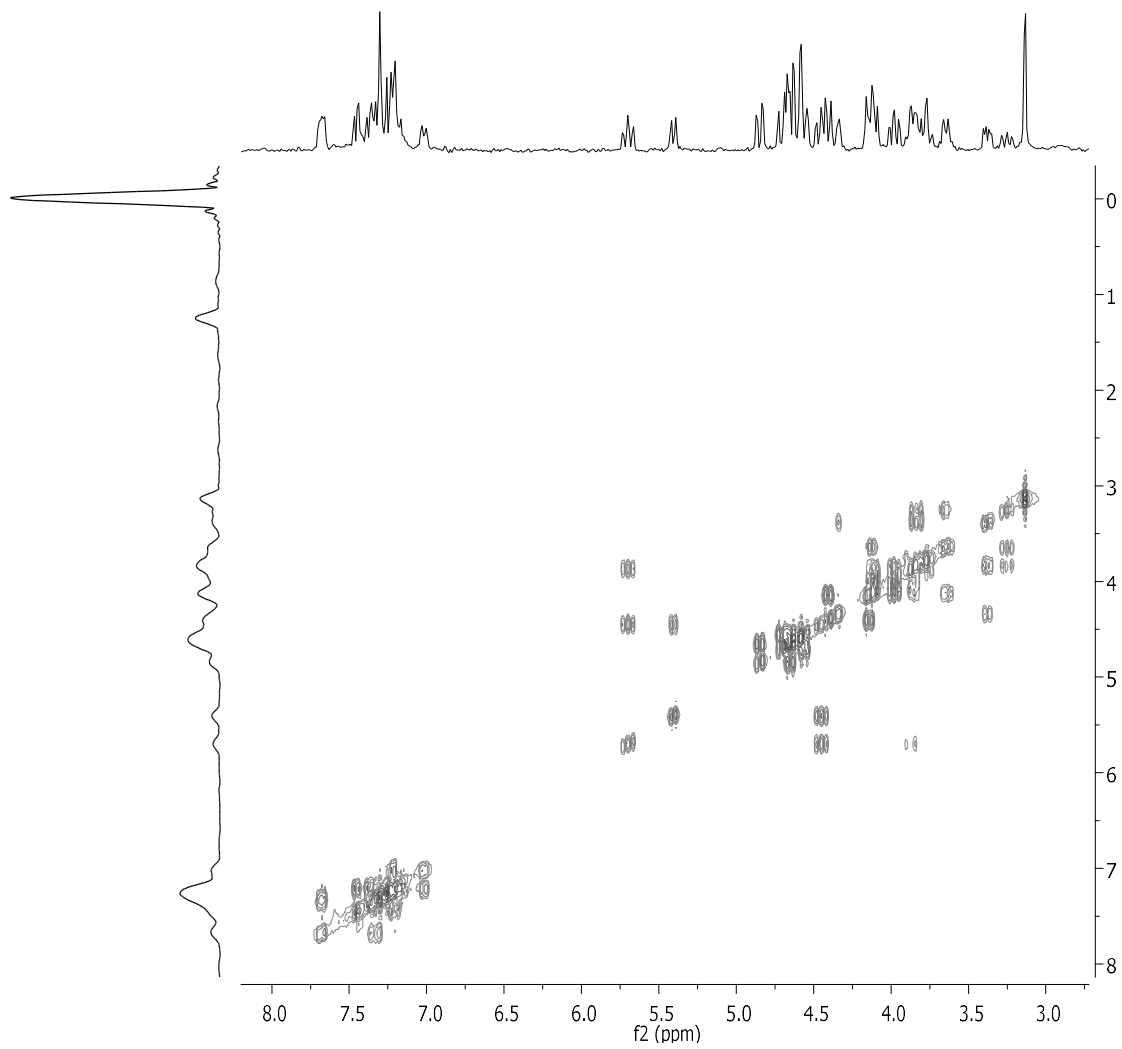

**Methyl 2,3,4,6-tetra-*O*-benzyl- $\alpha/\beta$ -D-glucopyranosyl-(1 $\rightarrow$ 6)-2,3,4-tri-*O*-benzoyl- $\beta$ -D-glucopyranosyl-(1 $\rightarrow$ 6)-2,3,4-tri-*O*-benzoyl- $\alpha$ -D-glucopyranoside (27).**

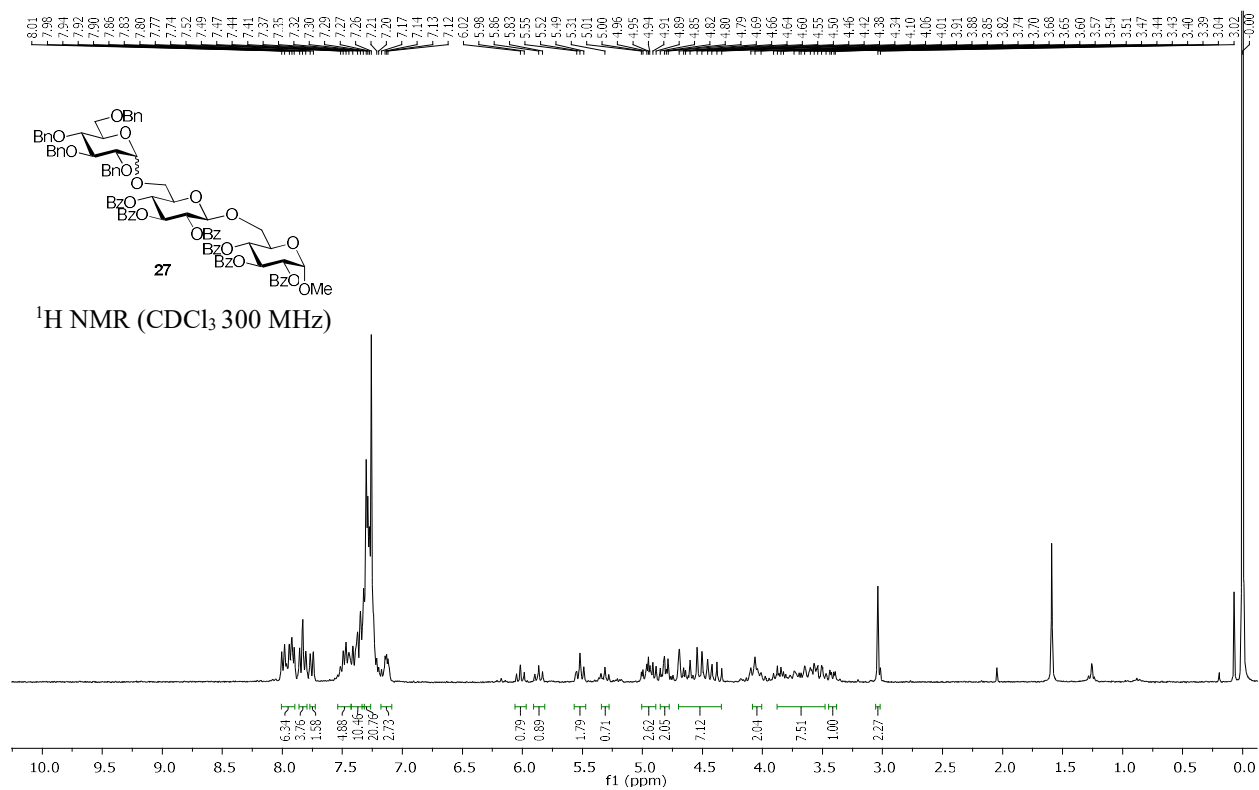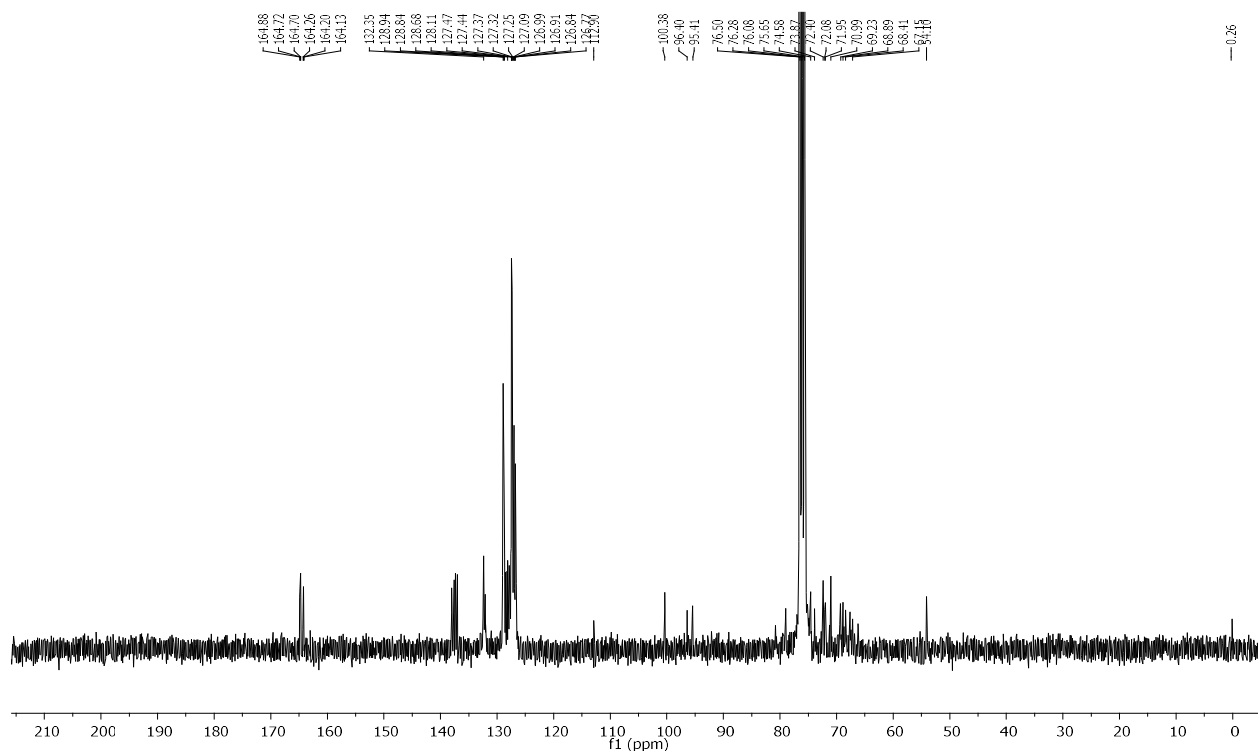





**Allyl 2-azido-4-O-benzyl-2-deoxy- $\beta$ -D-glucopyranoside (28).**

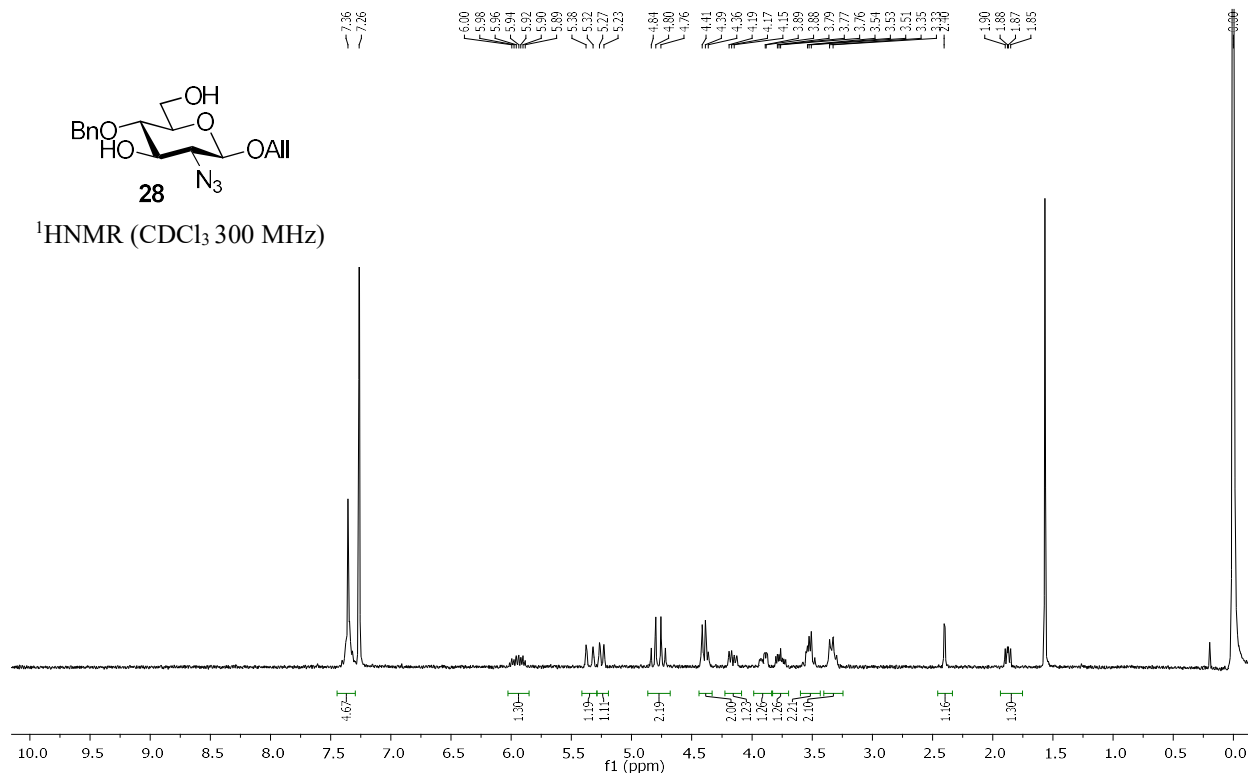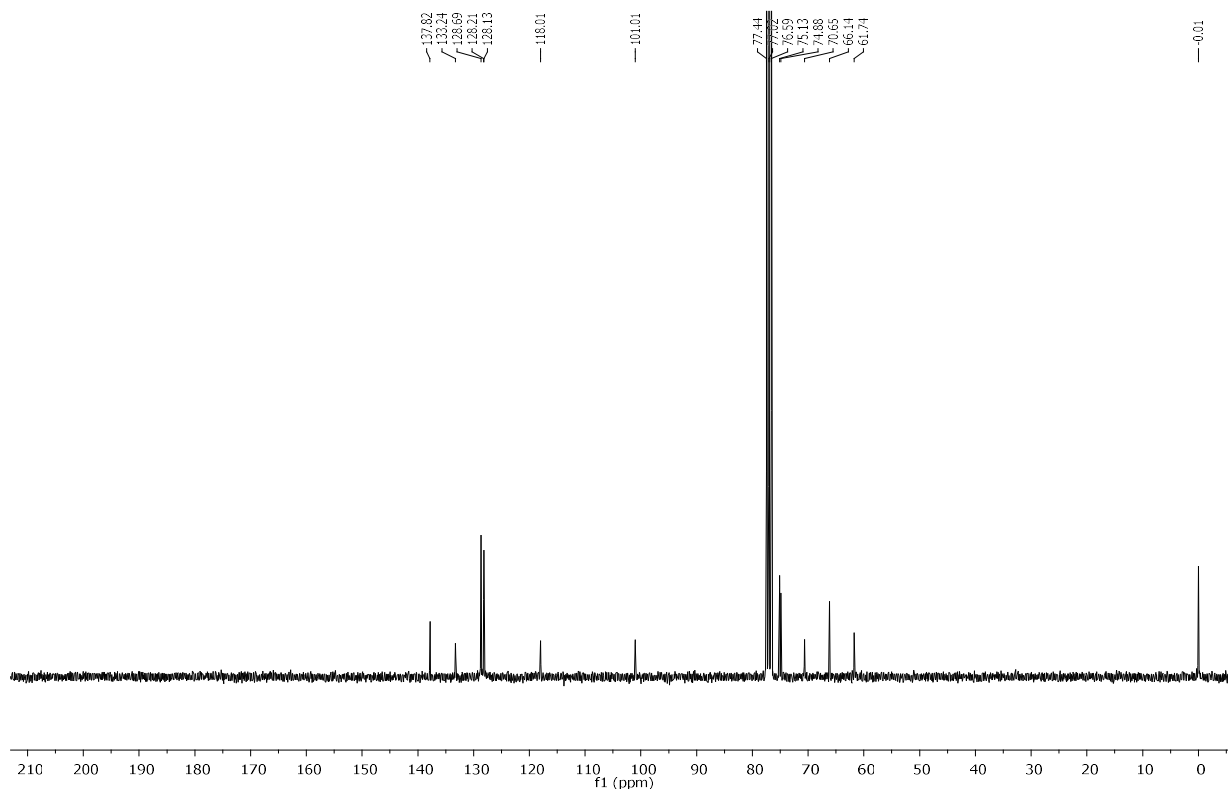

$^{13}\text{C NMR}$  (CDCl<sub>3</sub> 75 MHz)

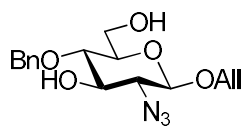

COSY NMR (CDCl<sub>3</sub>, 300 MHz)

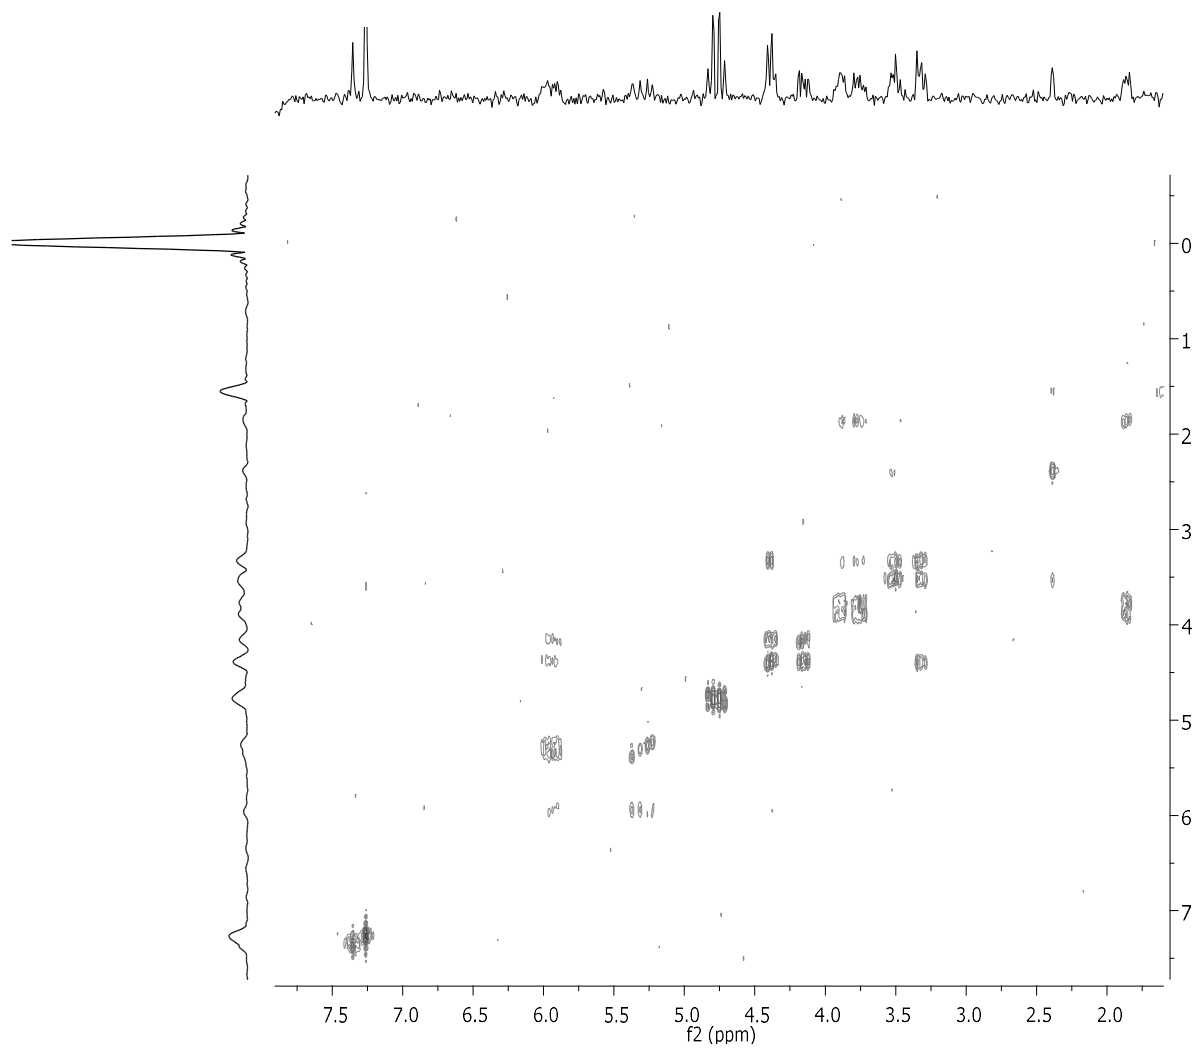



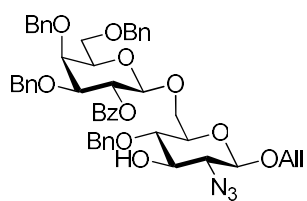

COSY NMR (CDCl<sub>3</sub>, 300 MHz)

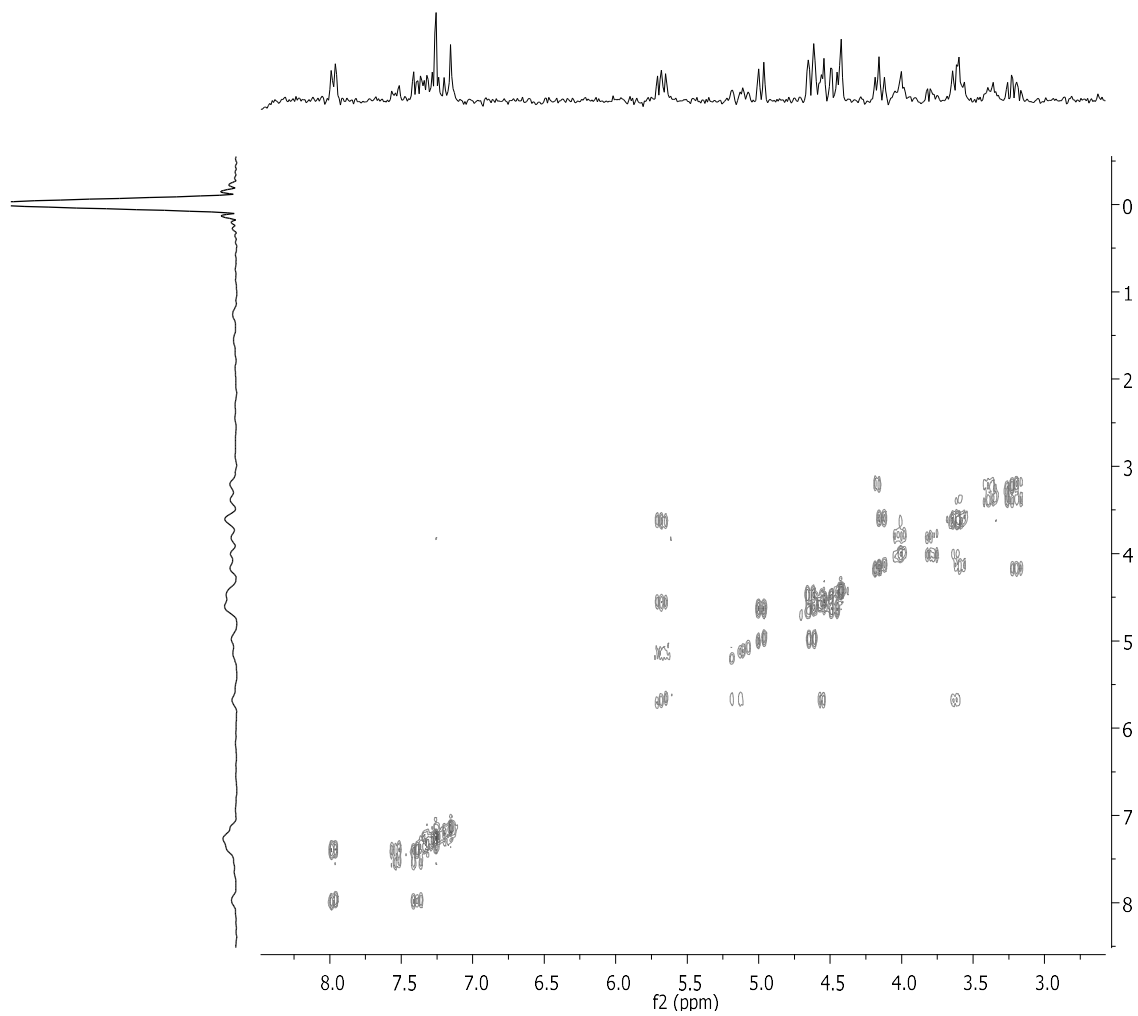

## NMR Proton Spectra for Known Compounds

### Methyl 6-*O*-(2-*O*-benzoyl-3,4,6-tri-*O*-benzyl- $\beta$ -D-galactopyranosyl)-2,3,4-tri-*O*-benzyl- $\alpha$ -D-glucopyranoside (3).

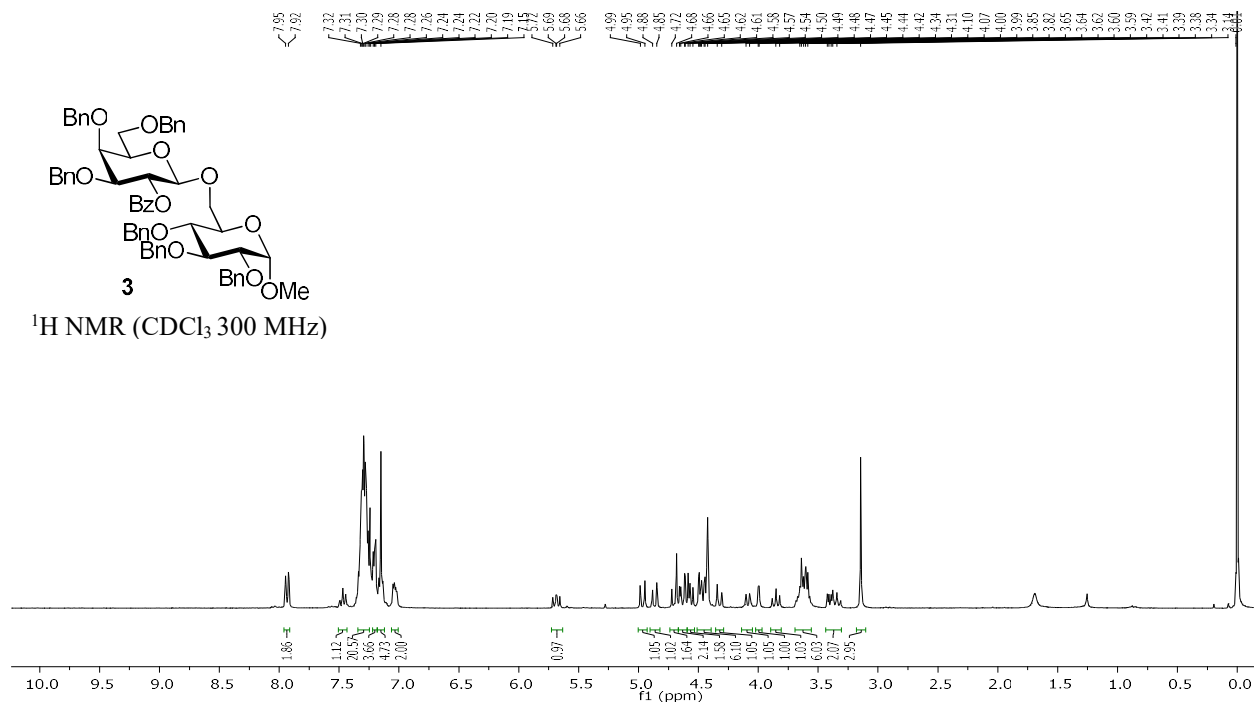

### Methyl 6-*O*-(2-*O*-benzoyl-3,4,6-tri-*O*-benzyl- $\beta$ -D-galactopyranosyl)-2,3,4-tri-*O*-benzoyl- $\alpha$ -D-glucopyranoside (5).

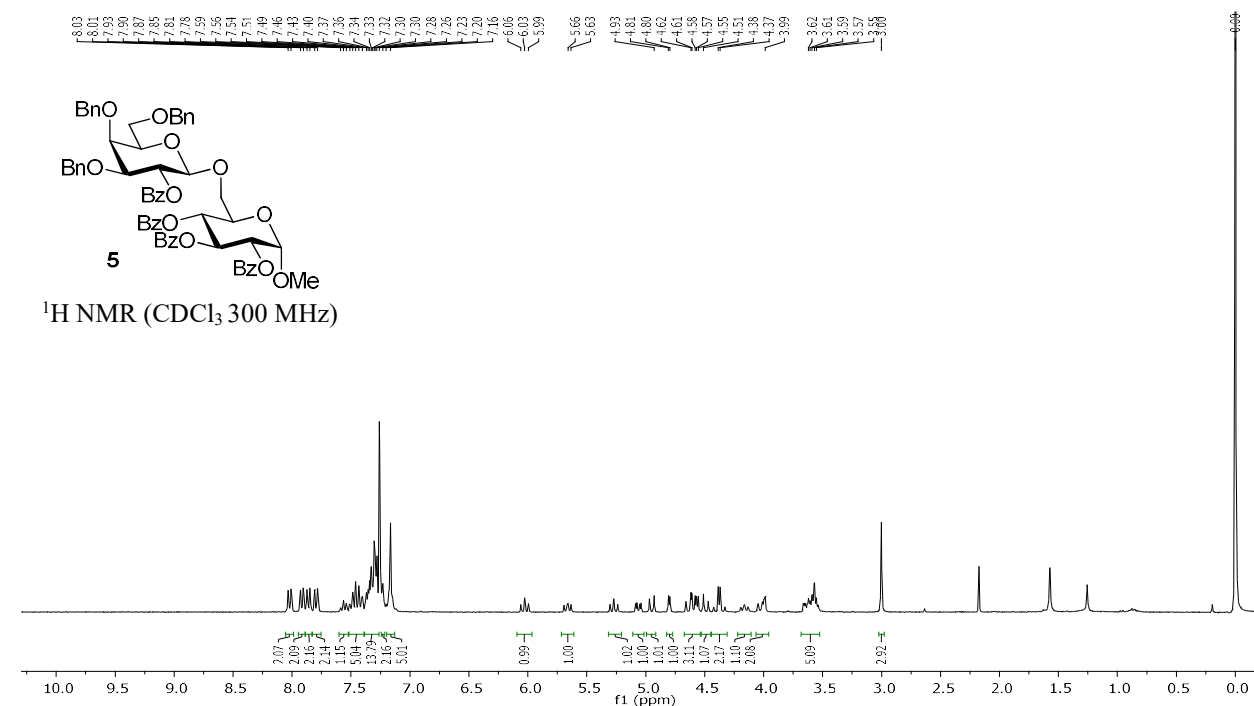

**Methyl 3-O-(2-O-benzoyl-3,4,6-tri-O-benzyl- $\beta$ -D-galactopyranosyl)-2,4,6-tri-O-benzyl- $\alpha$ -D-glucopyranoside (7).**

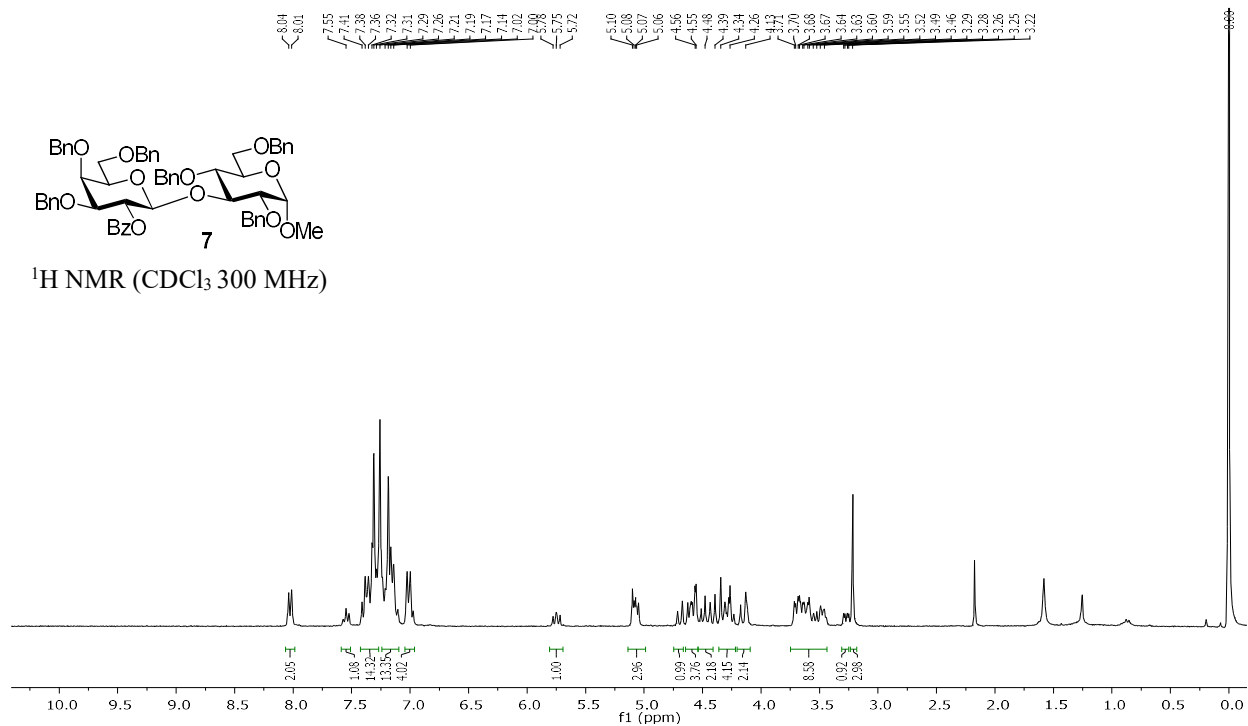

**Methyl 6-O-(2,3,4,6-tetra-O-Benzyl- $\alpha/\beta$ -D-galactopyranosyl)-2,3,4-tri-O-benzyl- $\alpha$ -D-glucopyranoside (11).**

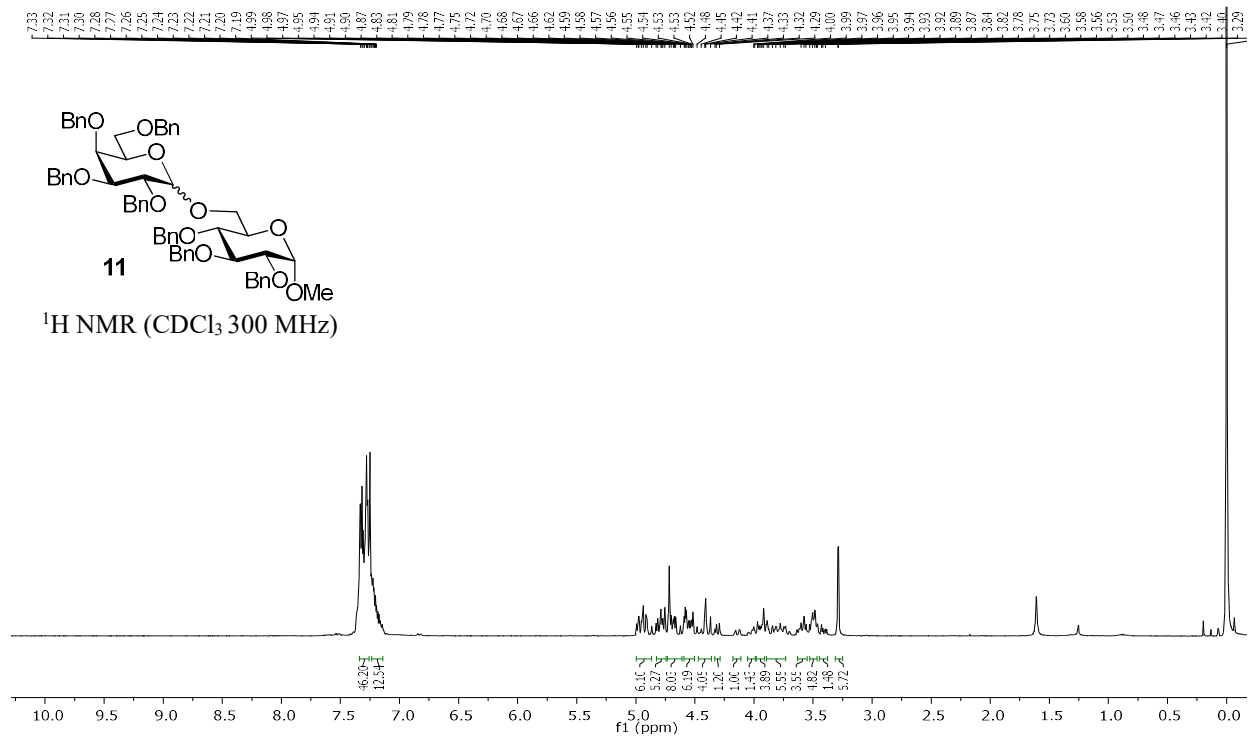

**Methyl 6-*O*-(2-*O*-benzoyl-3,4,6-tri-*O*-benzyl- $\alpha$ -D-mannopyranosyl)-2,3,4-tri-*O*-benzyl- $\alpha$ -D-glucopyranoside (13).**

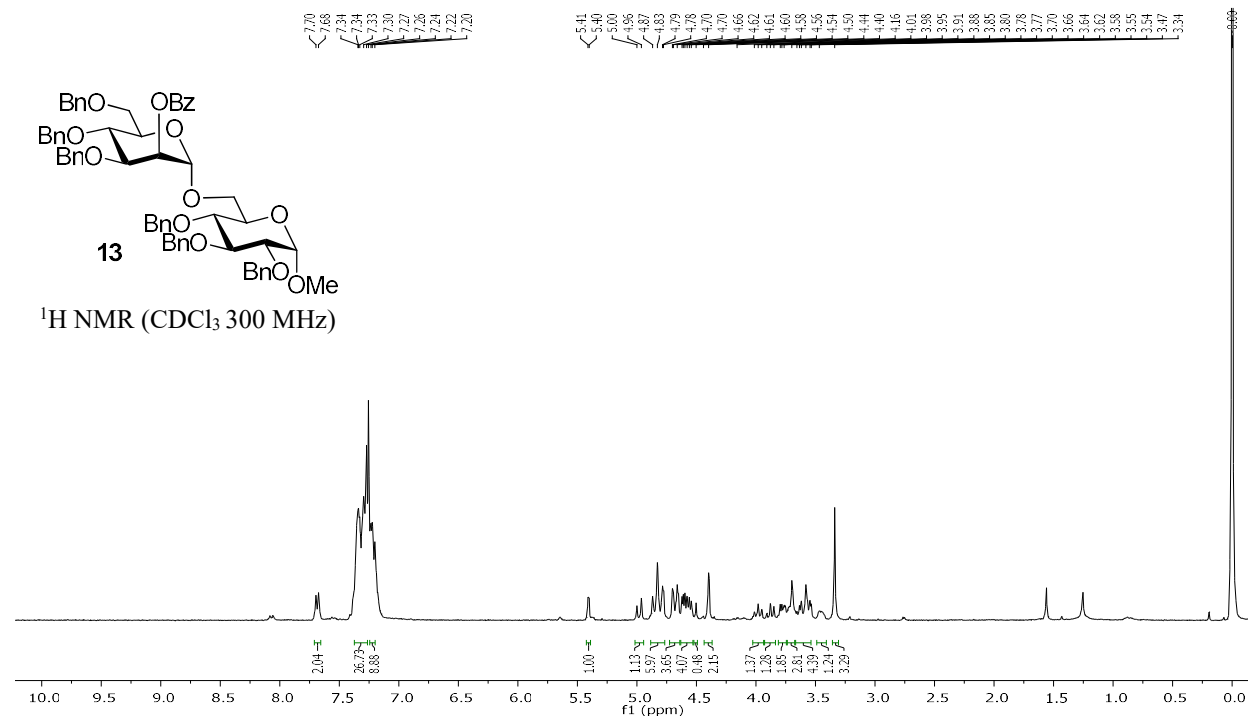

**Methyl 6-*O*-(2-*O*-benzoyl-3,4,6-tri-*O*-benzyl- $\beta$ -D-glucopyranosyl)-2,3,4-tri-*O*-benzyl- $\alpha$ -D-glucopyranoside (15).**

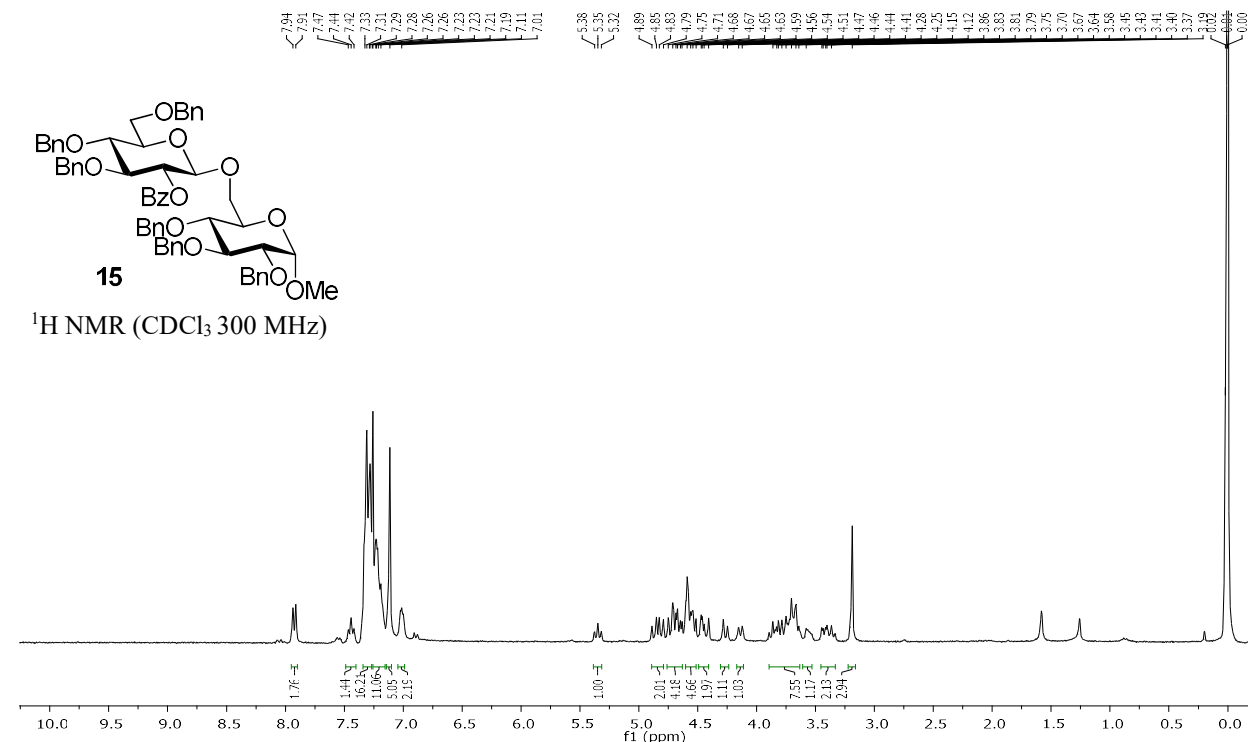



**Methyl 6-*O*-(2,3,4,6-tetra-*O*-benzoyl- $\beta$ -D-glucopyranosyl)-2,3,4-tri-*O*-benzyl- $\alpha$ -D-glucopyranoside (19).**

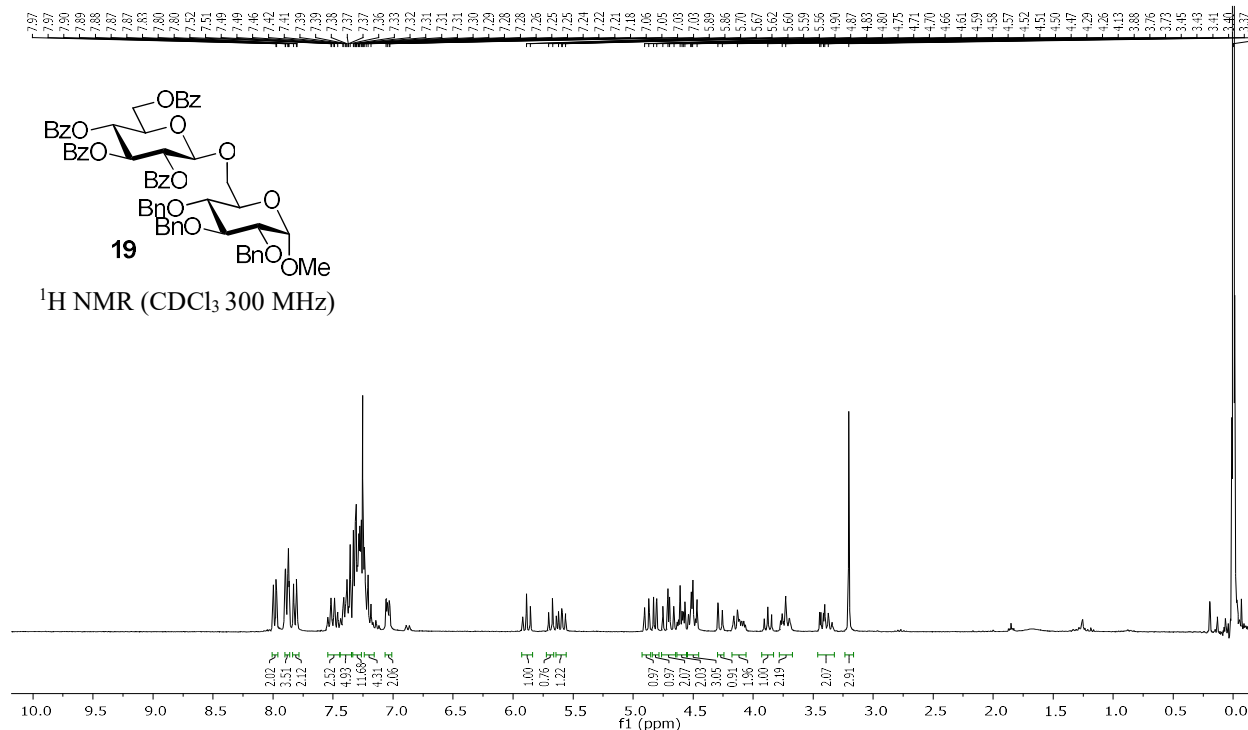

**Methyl 6-*O*-(2,3,4,6-tetra-*O*-benzyl- $\alpha/\beta$ -D-glucopyranosyl)-2,3,4-tri-*O*-benzyl- $\alpha$ -D-glucopyranoside (21).**

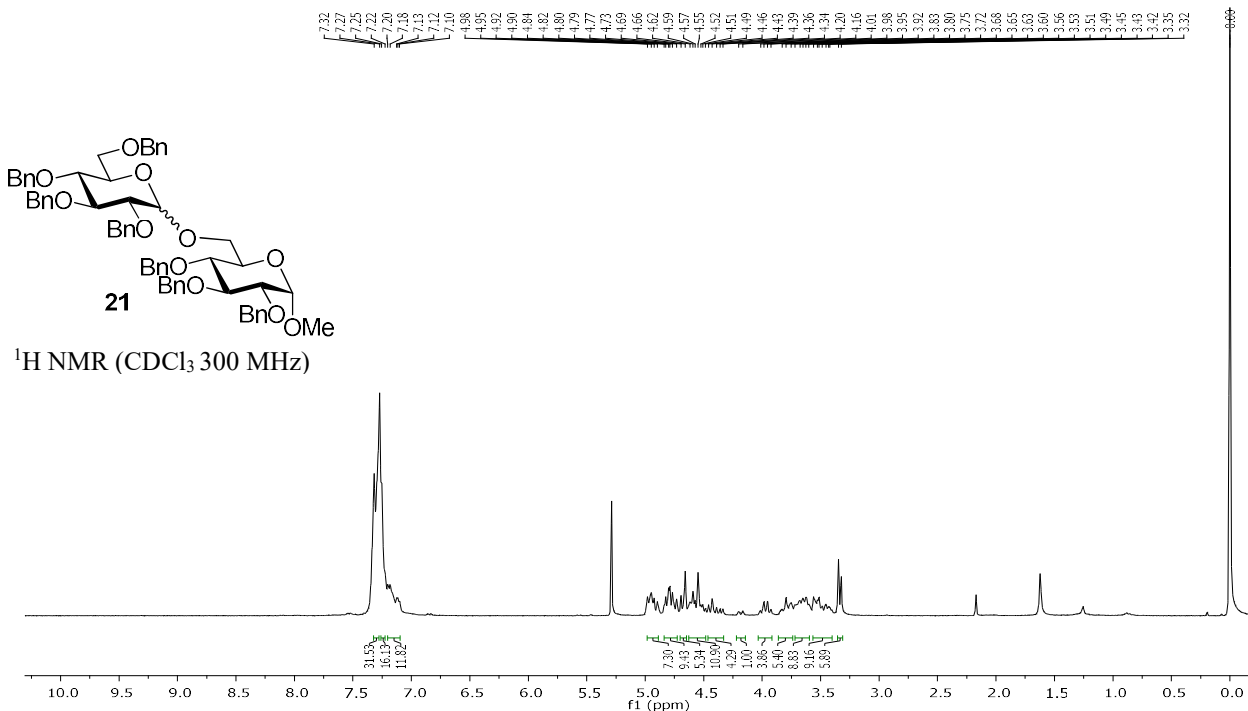

**Ethyl 2,3,4-tri-*O*-benzoyl- $\beta$ -D-glucopyranoside (23).**

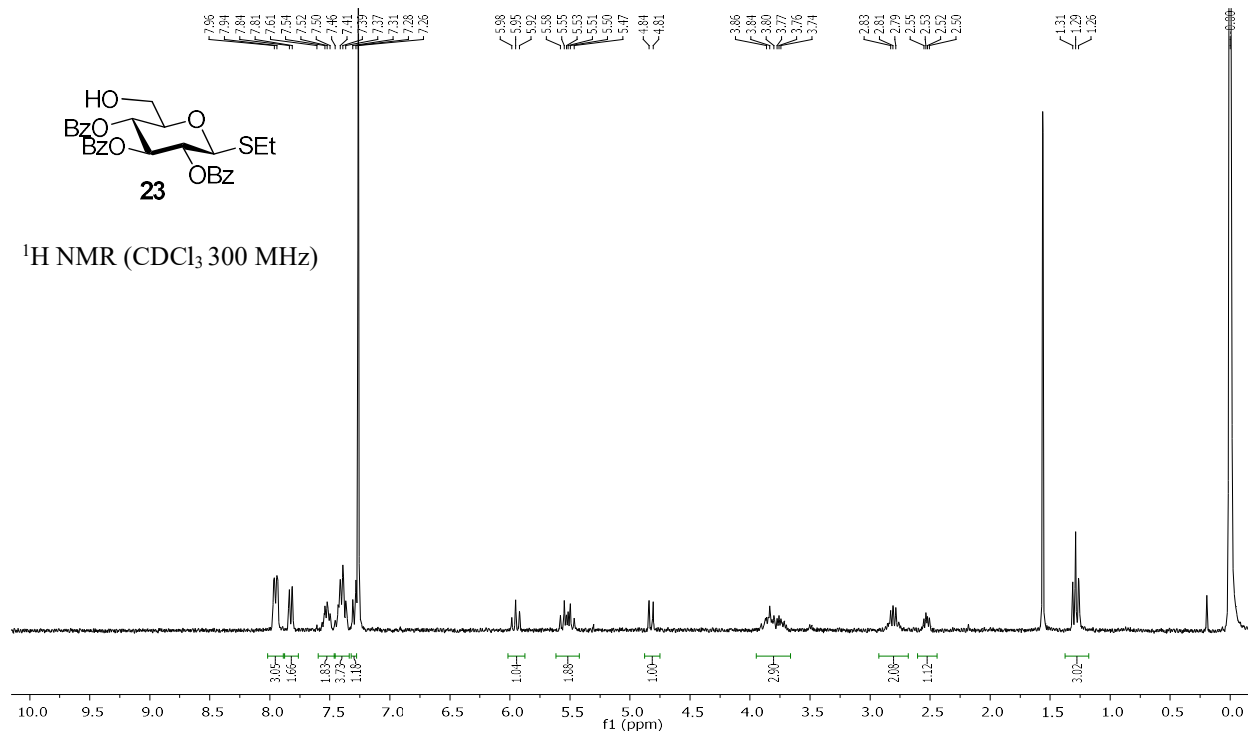

**Ethyl 6-*O*-(2,3,4,6-tetra-*O*-benzyl- $\alpha/\beta$ -D-glucopyranosyl)-2,3,4-tri-*O*-benzoyl- $\beta$ -D-glucopyranoside (24).**

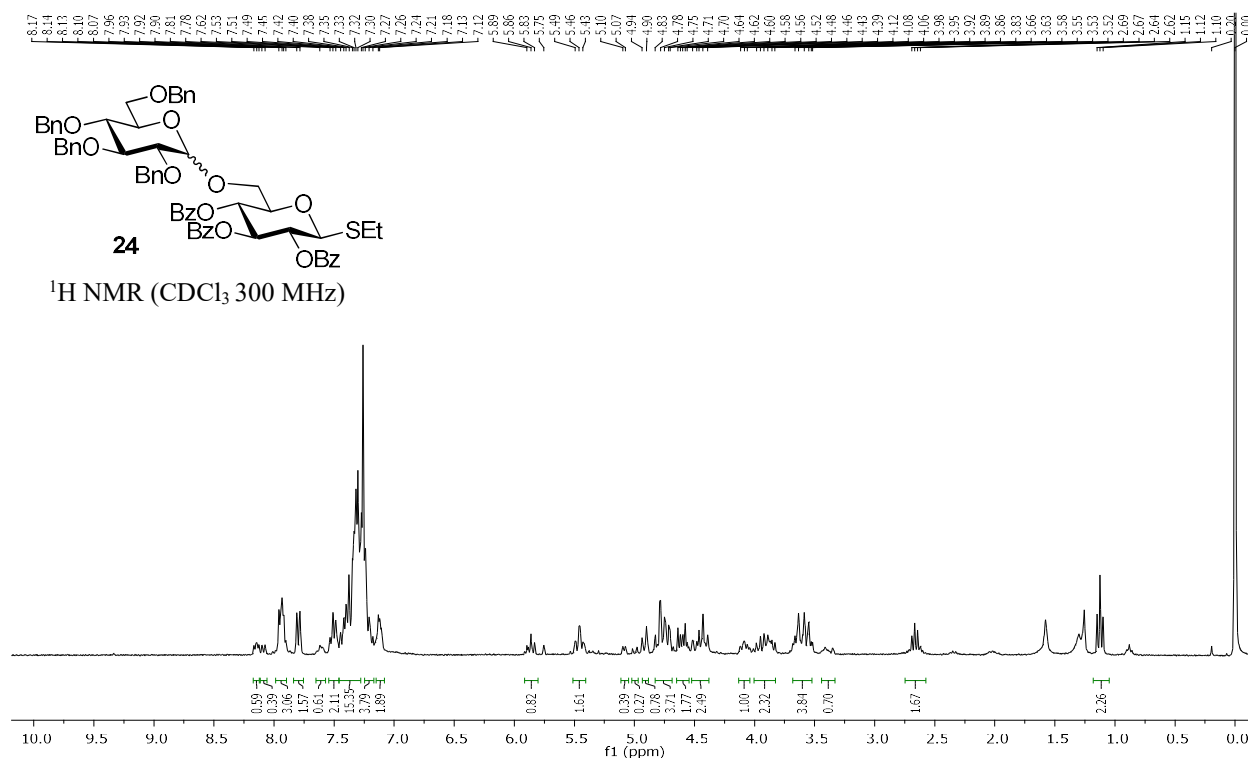

**Tolyl 2,3,4-tri-*O*-benzoyl- $\beta$ -D-glucopyranoside (25).**

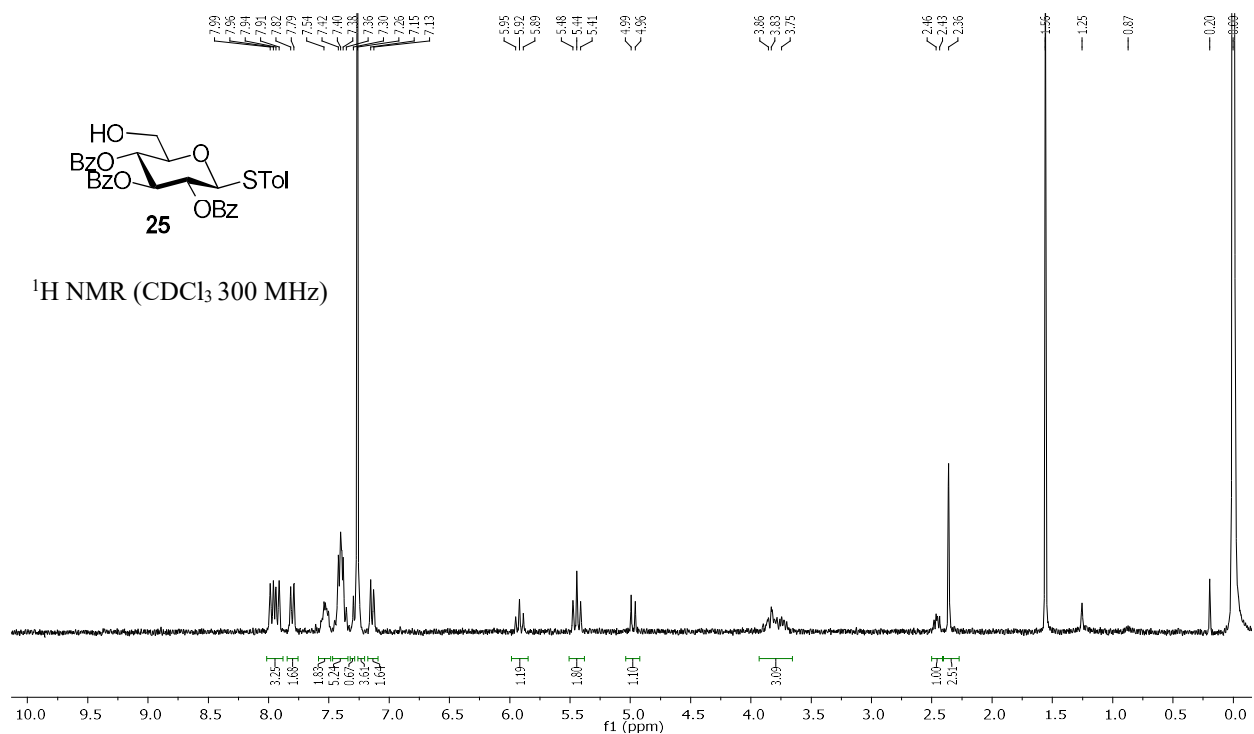

**Tolyl 6-*O*-(2,3,4,6-tetra-*O*-benzyl- $\alpha$ / $\beta$ -D-glucopyranosyl)-2,3,4-tri-*O*-benzoyl- $\beta$ -D-glucopyranoside (26).**

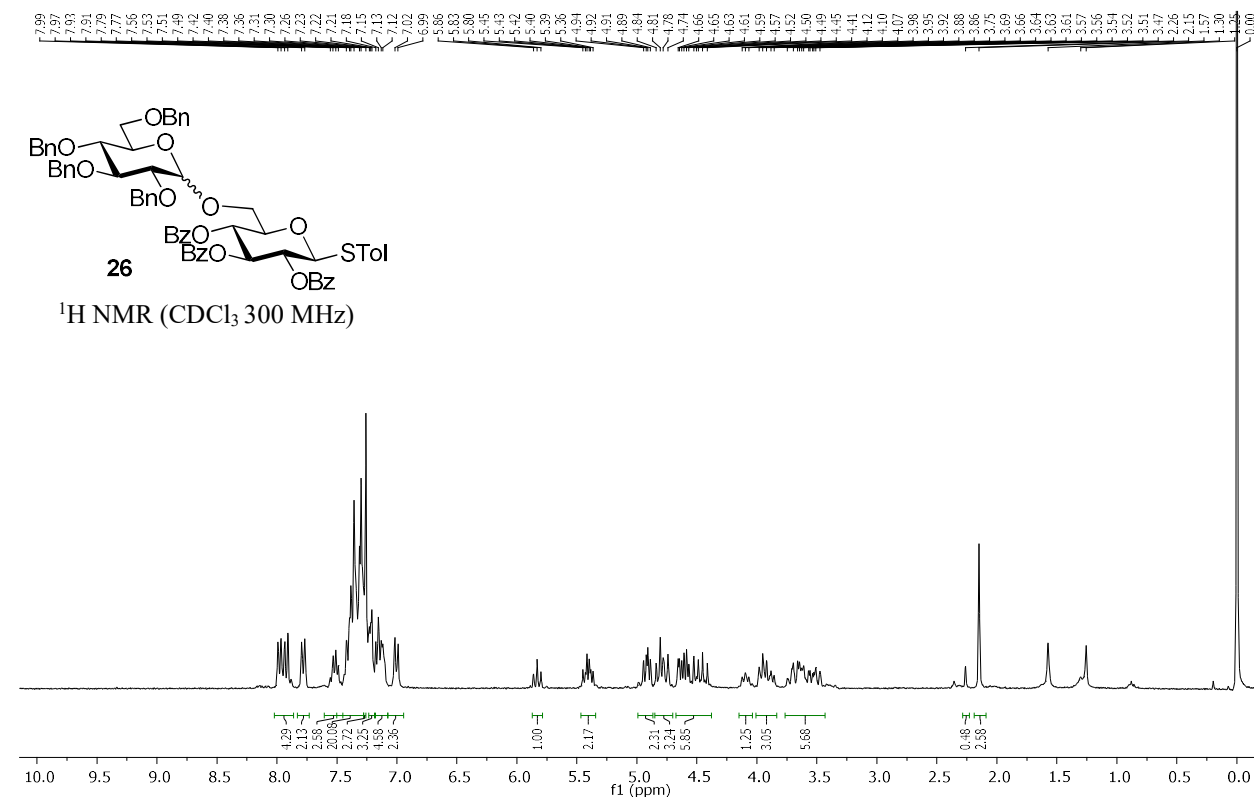

Supplement: d1ob00004g1.pdf [file d1ob00004g1.pdf]
